# Supplementary figures and images for: Deletion of the MAD2L1 spindle assembly checkpoint gene is tolerated in mouse models of acute T-cell lymphoma and hepatocellular carcinoma
Source: eLife journal article supplement (doi:10.7554/elife.20873), 2017-03-20

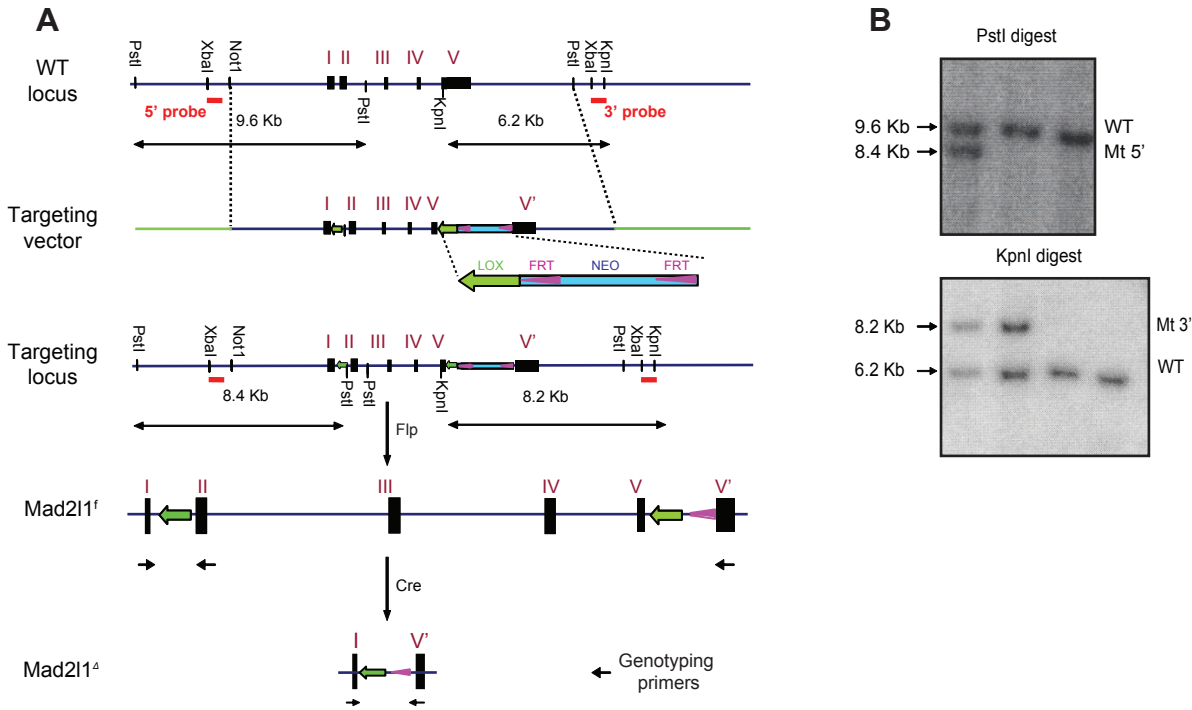

Supplement: supp [file elife_poa_e20873_Figure_1_Figure_Supplement_1.pdf › elife_poa_e20873_Figure_1_Figure_Supplement_1.pdf]

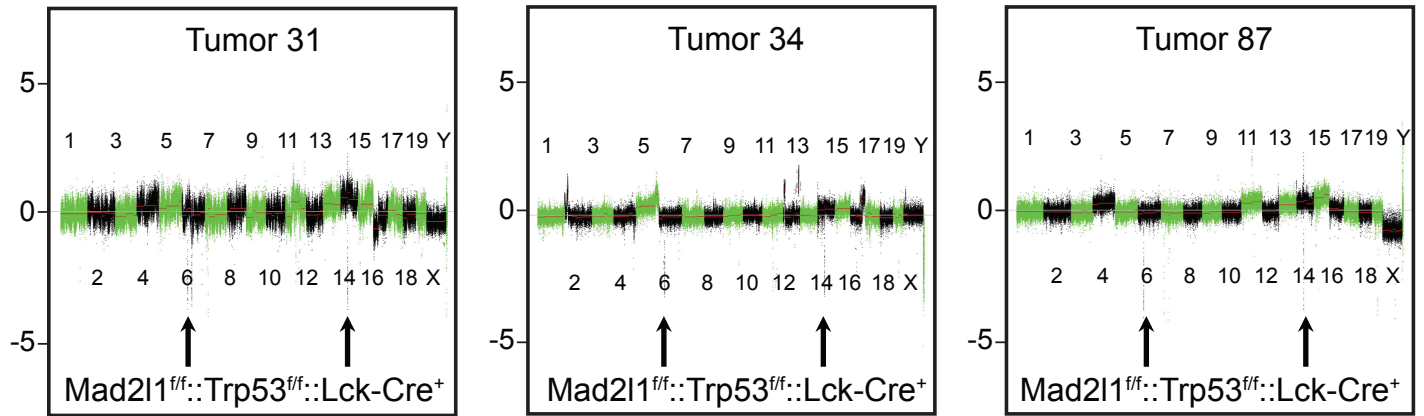

Foijer, Albacker et al - Figure 1 - Figure supplement 2

Supplement: supp [file elife_poa_e20873_Figure_1_Figure_Supplement_2.pdf › elife_poa_e20873_Figure_1_Figure_Supplement_2.pdf]

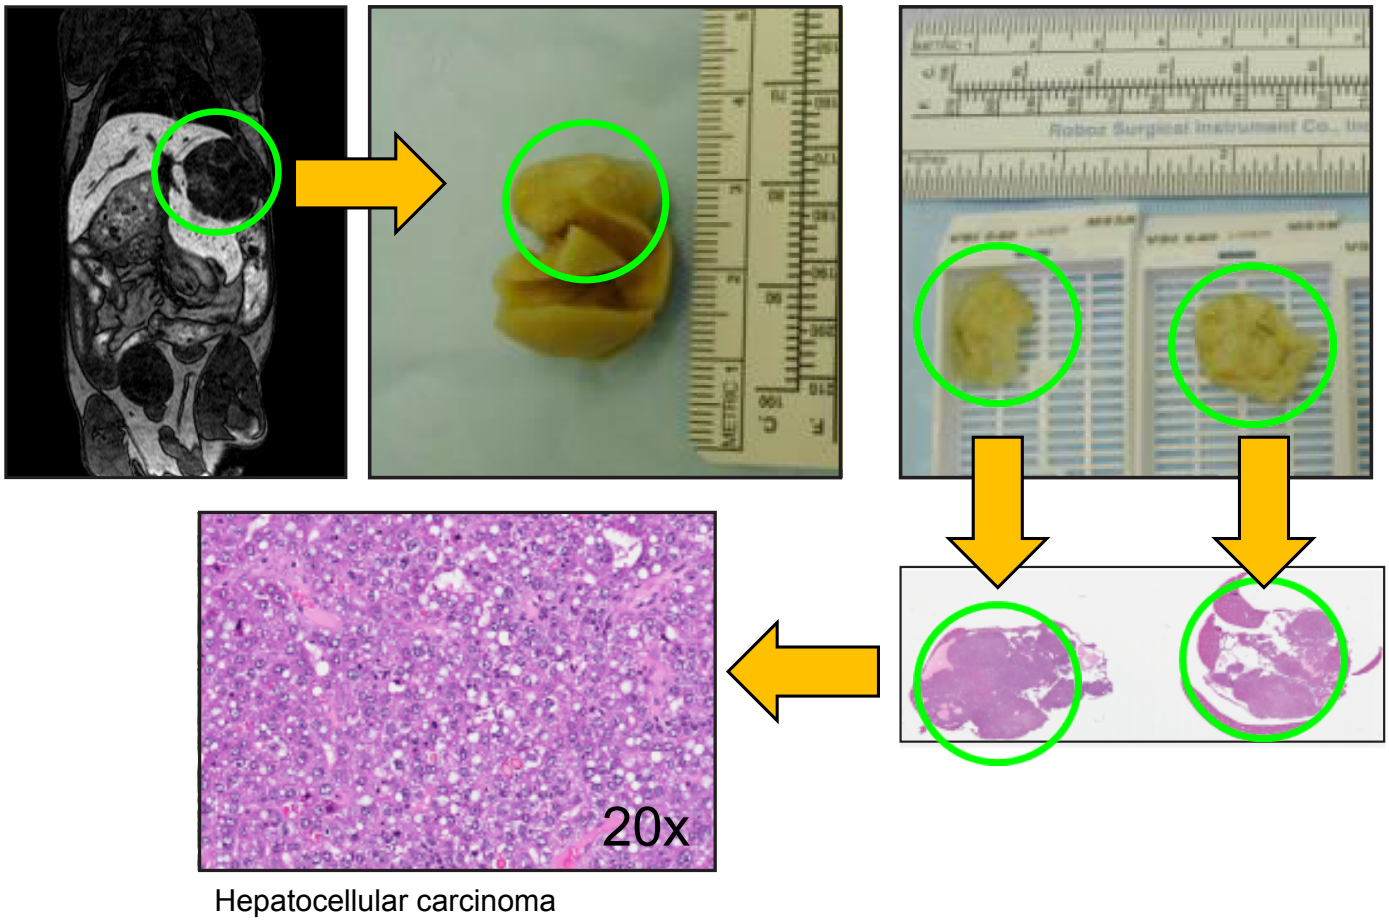

Fojer Albacker et al - Figure 2 - figure supplement 1

Supplement: supp [file elife_poa_e20873_Figure_2_Figure_Supplement_1.pdf › elife_poa_e20873_Figure_2_Figure_Supplement_1.pdf]

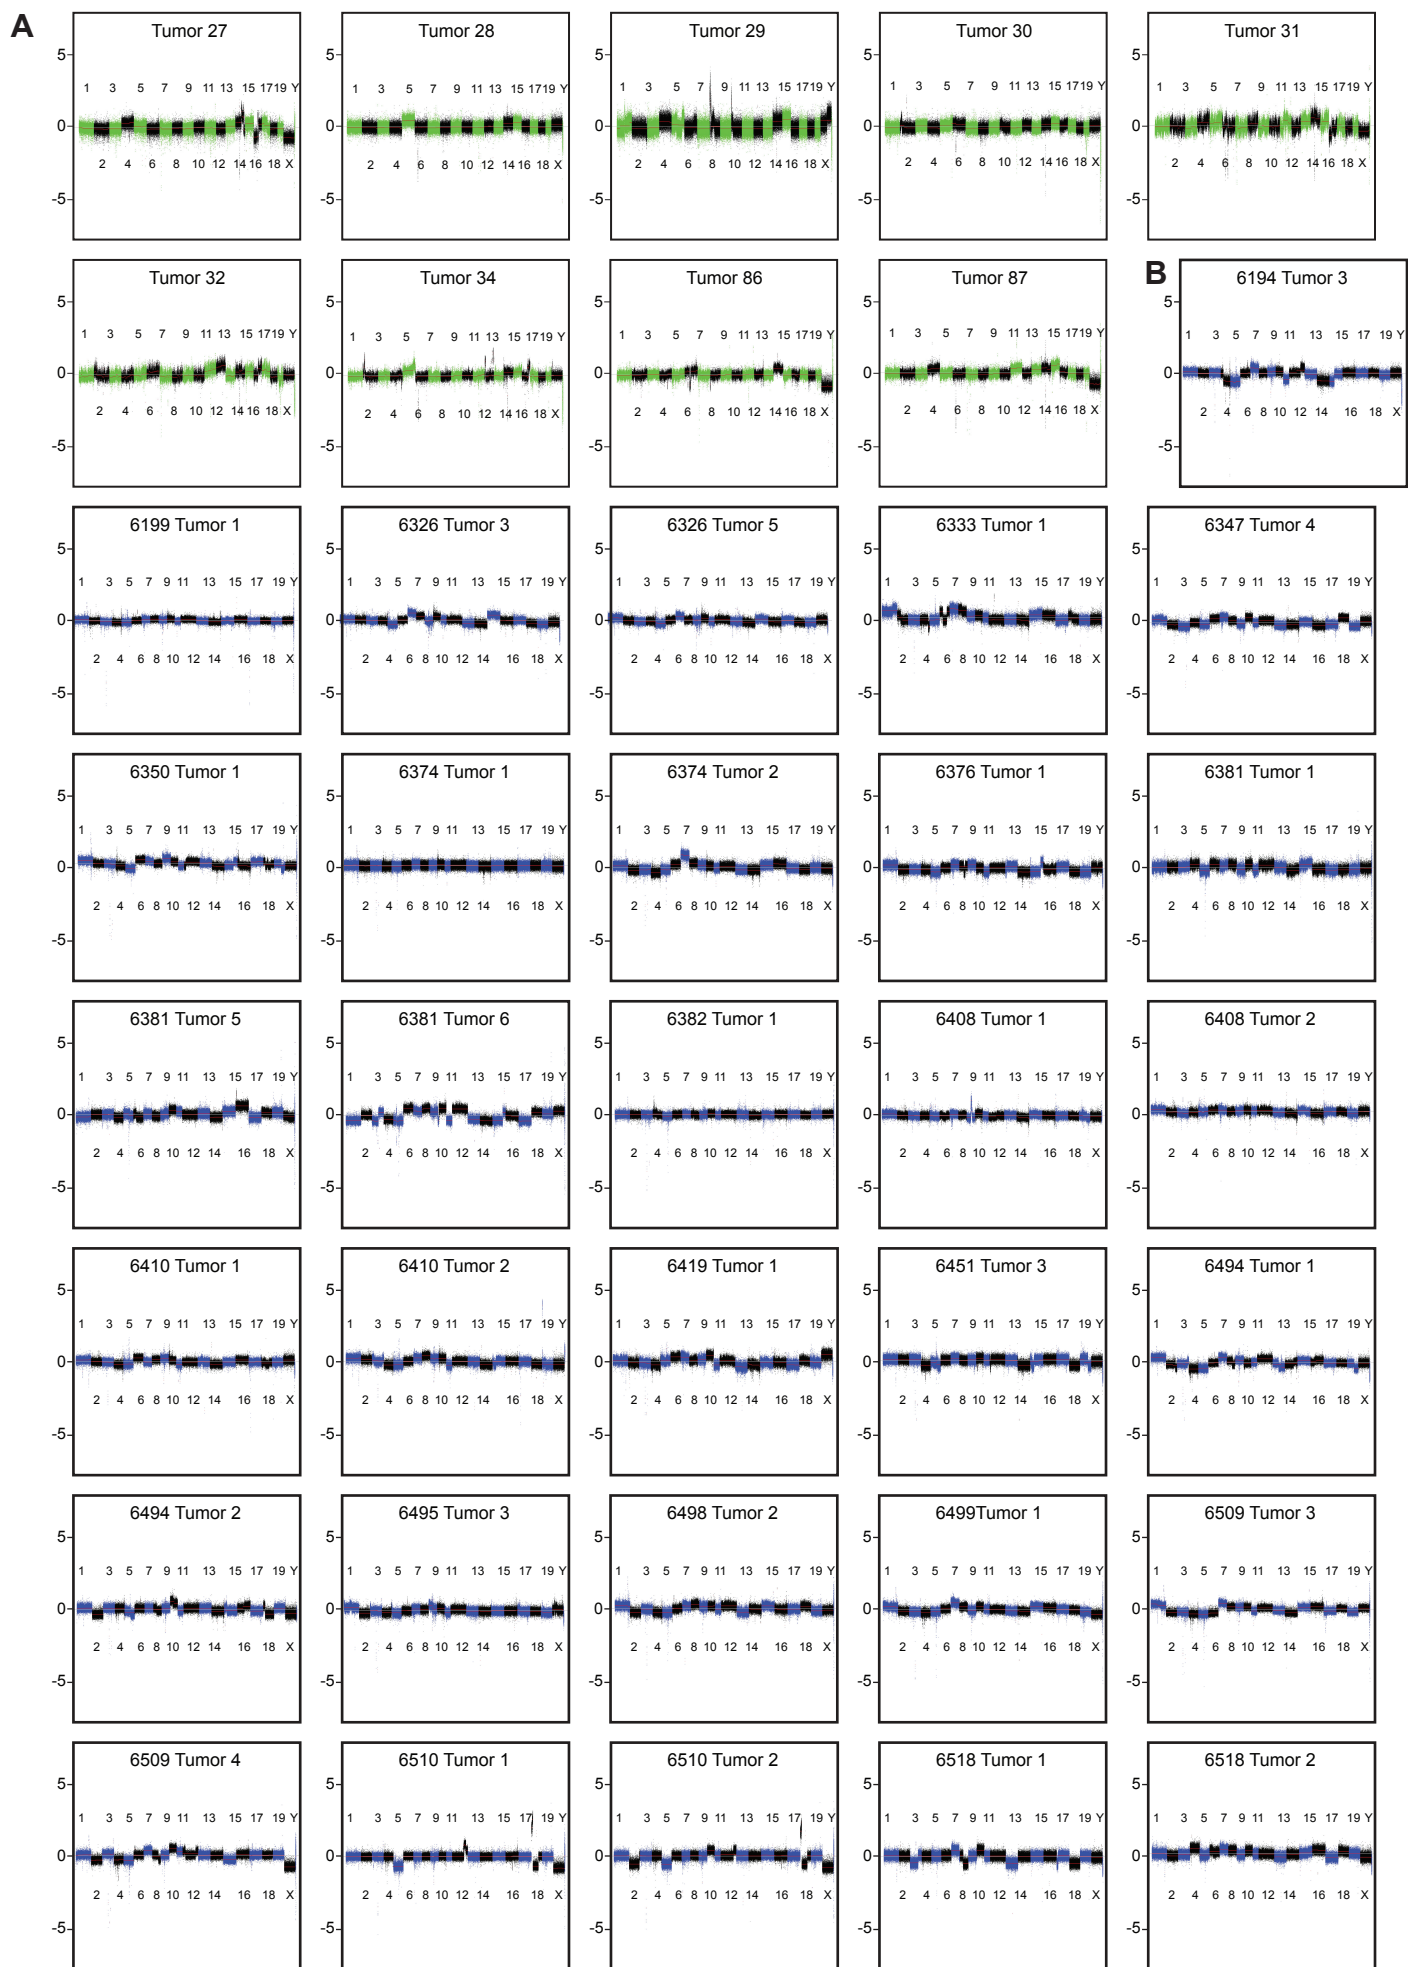

Foijer - Albacker et al - Figure 5 - figure supplement 1

Supplement: supp [file elife_poa_e20873_Figure_5_Figure_Supplement_1.pdf › elife_poa_e20873_Figure_5_Figure_Supplement_1.pdf]

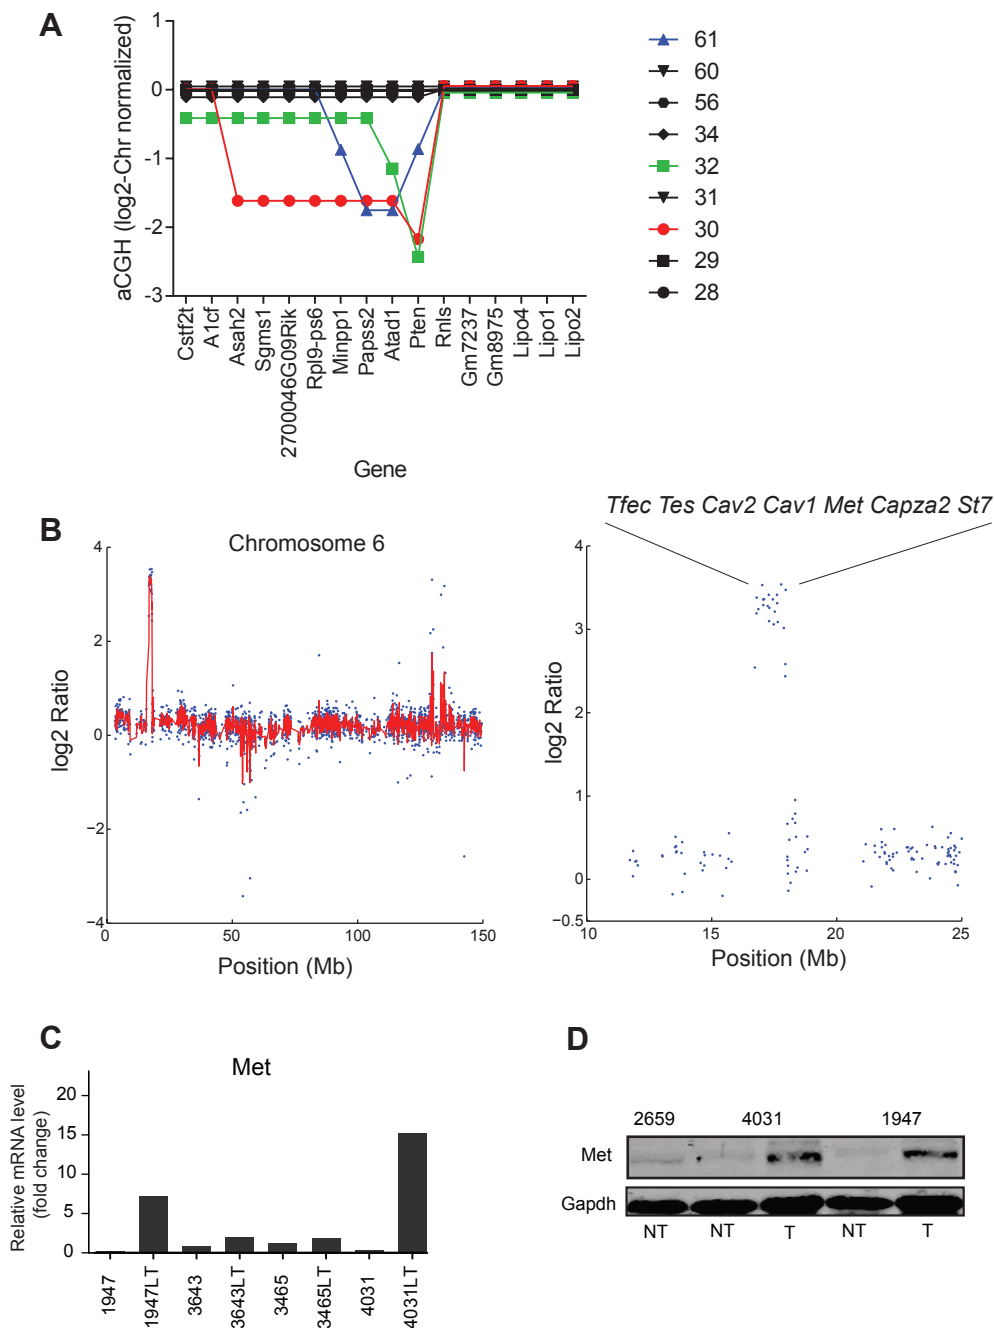

Supplement: supp [file elife_poa_e20873_Figure_5_Figure_Supplement_2.pdf › elife_poa_e20873_Figure_5_Figure_Supplement_2.pdf]

### Genome-wide aneuploidy & heterogeneity scores

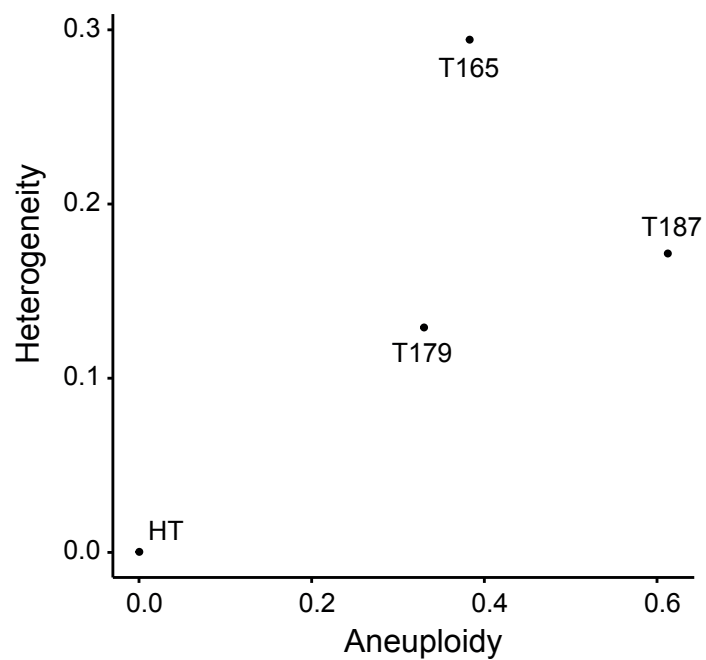

Foijer Albacker - Figure 6 - Figure supplement 1

Supplement: supp [file elife_poa_e20873_Figure_6_Figure_Supplement_1.pdf › elife_poa_e20873_Figure_6_Figure_Supplement_1.pdf]
